# Supplementary material
Source: PubMed Central journal article supplement (PMC7366279)

## Supplementary Online Content

Puzanov I, Ribas A, Robert C, et al. Association of *BRAF* V600E/K mutation status and prior BRAF/MEK inhibition with pembrolizumab outcomes in advanced melanoma: pooled analysis of 3 clinical trials. *JAMA Oncol*. Published online July 16, 2020. doi:10.1001/jamaoncol.2020.2288.

### eMethods

**eTable 1. Univariate Analysis of Factors Associated With Best Overall Response per RECIST v 1.1 per Investigator Review**

**eTable 2. Multivariate Analysis of Factors Associated With Best Overall Response per RECIST v 1.1 per Investigator Review, Accounting for Patients With Missing Baseline Tumor Size**

**eTable 3. Multivariate Analysis of Factors Associated With Progression-Free Survival per RECIST v1.1 per Investigator Review With Study as a Covariate**

**eTable 4. Any-Grade Treatment-Related Adverse Events That Occurred in  $\geq 5\%$  of Patients**

**eFigure 1. Overall Response Rate in Evaluable Patients (N = 1558) With *BRAF* Wild-Type Versus Mutant Melanoma**

**eFigure 2. Four-Year Progression-Free Survival (PFS) and Overall Survival (OS) in Patients With *BRAF* Wild-Type Versus Mutant Melanoma**

**eFigure 3. Kaplan-Meier Estimates of Overall Survival**

This supplementary material has been provided by the authors to give readers additional information about their work.

## eMETHODS

### Study Design and Patients

KEYNOTE-001, an international, open-label, phase 1 study of pembrolizumab, enrolled patients with locally advanced/metastatic melanoma not amenable to local therapy and an Eastern Cooperative Oncology Group (ECOG) performance status of 0 or 1 who were either ipilimumab naive (received  $\leq 2$  prior systemic treatments for melanoma), ipilimumab treated ( $< 12$  weeks from first ipilimumab dose and  $> 6$  weeks from last dose with documented progressive disease [PD]), or ipilimumab refractory (documented PD within 24 weeks of last ipilimumab dose). KEYNOTE-002, an international, phase 2, randomized controlled trial to compare pembrolizumab with investigator choice of chemotherapy, enrolled patients with ECOG performance status 0 or 1, who were ipilimumab-refractory (received  $\geq 2$  doses of ipilimumab with confirmed PD after last ipilimumab dose), and had unresectable stage III/IV melanoma not amenable to local therapy. KEYNOTE-006, an international, randomized, open-label, phase 3 study to compare pembrolizumab with ipilimumab, enrolled patients with unresectable stage III/IV ipilimumab-naive melanoma not amenable to local therapy, who had received  $\leq 1$  prior systemic therapy for advanced/metastatic disease, had received no previous treatment with anti-CTLA-4, anti-programmed death 1 [PD-1], or anti-programmed death ligand 1 [PD-L1] agents, and with known  $BRAF^{V600}$  mutation status.

Regarding BRAF mutation status, in KEYNOTE-001, ipilimumab-naive patients with  $BRAF^{V600E/K}$  mutation might have previously received treatment with a BRAFi  $\pm$  MEKi and ipilimumab-refractory patients with  $BRAF^{V600E/K}$  mutation were required to have received prior BRAFi  $\pm$  MEKi therapy. In KEYNOTE-002, patients with  $BRAF^{V600E/K}$  mutation were required to have previously received BRAFi  $\pm$  MEKi therapy. In KEYNOTE-006, patients with  $BRAF^{V600E/K}$  mutation might have previously received prior BRAFi  $\pm$  MEKi therapy as first-line systemic therapy; however, BRAFi  $\pm$  MEKi therapy was not required for patients with normal lactate dehydrogenase levels and no clinically significant tumor-related symptoms or evidence of rapid disease progression.

### PD-L1 Expression

PD-L1 expression was assessed in tumor biopsy samples by immunohistochemistry using the 22C3 PD-L1 IHC assay (Agilent Technologies, Santa Clara, CA).

### Statistical Analysis

To determine baseline risk factors associated with best overall response, univariable analysis of each independent variable was conducted; factors for which the univariable test had a  $P$  value of less than 0.05 and the factor had clinical relevance were selected for the multivariable logistic regression model. A stepwise selection method was used to select risk factors in the final model. No multiplicity adjustments were made in the univariate analysis.

To control for the differences in inclusion and exclusion criteria across clinical studies (KEYNOTE-001, KEYNOTE-002, and KEYNOTE-006), the clinical study was added as a covariate to the model on baseline factors associated with progression-free survival (PFS) (eTable 3). We conducted a sensitivity analysis wherein the model included the clinical study (KEYNOTE-001, KEYNOTE-002, or KEYNOTE-006) as a covariate.

A key assumption in the logistic regression model was that the logits were linearly related to each independent variable; this assumption was examined using the logit plot. In the final model, the logit plot of the continuous variable albumin/albumin upper limit of normal demonstrated that this assumption was valid. The Hosmer-Lemeshow Goodness-of-fit test was used to test model performance. No interaction terms were included in the model. Available case analysis was used to address missing data. The majority of missing data was for baseline tumor size; therefore, a sensitivity analysis was used where all patients with missing baseline tumor size were categorized into a third subgroup. The results of the sensitivity analyses were consistent with the final model.

**eTable 1. Univariate Analysis of Factors Associated With Best Overall Response per RECIST v 1.1 per Investigator Review**

| <b>Risk Factor</b>                       | <b>Effect</b>                    | <b>Odds Ratio</b> | <b>95% Confidence Interval</b> | <b>P</b> |
|------------------------------------------|----------------------------------|-------------------|--------------------------------|----------|
| Age group                                | <65 vs ≥65                       | 0.732             | (0.60-0.90)                    | .00293   |
| Baseline LDH level                       | Elevated vs normal               | 0.406             | (0.32-0.51)                    | <.00001  |
| <i>BRAF</i> mutation                     | Mutant vs wild type              | 0.790             | (0.63-1.00)                    | .04597   |
| Brain metastasis                         | No vs yes                        | 1.055             | (0.75-1.48)                    | .75556   |
| Baseline tumor size                      | ≤93 mm vs >93 mm <sup>a</sup>    | 2.951             | (2.34-3.72)                    | <.00001  |
| Metastatic staging                       | M0/M1a/M1b vs M1c                | 1.788             | (1.42-2.25)                    | <.00001  |
| ECOG performance status at screening     | 0 vs 1                           | 1.499             | (1.20-1.87)                    | .00029   |
| Ipilimumab exposure                      | Exposed vs naive                 | 0.606             | (0.49-0.75)                    | <.00001  |
| LDH/(LDH ULN)                            | —                                | 0.476             | (0.39-0.58)                    | <.00001  |
| No. of metastasis locations              | —                                | 0.862             | (0.81-0.92)                    | <.00001  |
| Prior systemic BRAFi therapy             | No vs yes                        | 1.724             | (1.31-2.27)                    | .00011   |
| PD-L1 status                             | Unknown vs PD-L1 negative        | 2.055             | (1.45-2.91)                    | .04340   |
|                                          | PD-L1 positive vs PD-L1 negative | 2.454             | (1.81-3.33)                    | <.00001  |
| No. of prior melanoma systemic therapies | 0 vs ≥3                          | 2.236             | (1.60-3.12)                    | <.00001  |
|                                          | 1 vs ≥3                          | 1.444             | (1.03-2.03)                    | .97702   |
|                                          | 2 vs ≥3                          | 1.333             | (0.92-1.92)                    | .43886   |
| Sex                                      | Female vs male                   | 0.615             | (0.50-0.76)                    | <.00001  |
| Clinical study                           | KEYNOTE-001 vs KEYNOTE-006       | 0.921             | (0.73-1.16)                    | .01945   |
|                                          | KEYNOTE-002 vs KEYNOTE-006       | 0.512             | (0.39-0.68)                    | <.00001  |
| Planned treatment for period KEYNOTE-001 | 10 mg/kg Q2W vs 2 mg/kg Q3W      | 1.759             | (1.31-2.36)                    | .00112   |
|                                          | 10 mg/kg Q3W vs 2 mg/kg Q3W      | 1.443             | (1.10-1.89)                    | .42447   |
| Weight, kg                               | —                                | 1.009             | (1.00-1.01)                    | .00086   |

Abbreviations: ECOG, Eastern Cooperative Oncology Group; LDH, lactate dehydrogenase; Q2W, every 2 weeks; Q3W, every 3 weeks; ULN, upper limit of normal.

<sup>a</sup>Cutoff chosen based on the value that showed the most significant difference in response.

**eTable 2 Multivariate Analysis<sup>a</sup> of Factors Associated With Best Overall Response per RECIST v 1.1 per Investigator Review, Accounting for Patients With Missing Baseline Tumor Size**

| <b>Risk Factor</b>           | <b>Effect</b>                 | <b>Odds Ratio</b> | <b>95% Confidence Interval</b> | <b>P</b> |
|------------------------------|-------------------------------|-------------------|--------------------------------|----------|
| Albumin/albumin ULN          | units = -1 <sup>b</sup>       | 0.206             | (0.07-0.60)                    | .00356   |
| Baseline LDH level           | Elevated vs normal            | 0.588             | (0.46-0.75)                    | .00003   |
| Baseline tumor size          | >93 mm vs ≤93 mm <sup>c</sup> | 0.474             | (0.36-0.62)                    | .00034   |
| Ipilimumab exposure          | Exposed vs naive              | 0.744             | (0.59-0.93)                    | .01001   |
| Prior systemic BRAFi therapy | Yes vs no                     | 0.666             | (0.50-0.89)                    | .00697   |
| PD-L1 status                 | Negative vs Positive          | 0.476             | (0.35-0.66)                    | <.00001  |
| Sex                          | Female vs male                | 0.620             | (0.49-0.78)                    | .00004   |

Abbreviations: LDH, lactate dehydrogenase; ULN, upper limit of normal.

<sup>a</sup>Analysis included all response-evaluable patients, regardless of *BRAF*-mutation status.

<sup>b</sup>One unit decrease was used to ensure the odds ratio direction for all risk factors was the same.

<sup>c</sup>Cutoff chosen based on the value that showed the most significant difference in response.

**eTable 3. Multivariate Analysis of Factors Associated With Progression-Free Survival per RECIST v1.1 per Investigator Review With Study as a Covariate**

| <b>Risk Factor</b>                   | <b>Effect</b>                 | <b>Hazard Ratio</b> | <b>95% CI</b> | <b>P</b> |
|--------------------------------------|-------------------------------|---------------------|---------------|----------|
| Baseline LDH level                   | Elevated vs normal            | 1.432               | (1.257-1.632) | <.0001   |
| ECOG performance status at screening | 1 vs 0                        | 1.199               | (1.059-1.358) | .0043    |
| PD-L1 status                         | Negative vs positive          | 1.536               | (1.311-1.800) | <.0001   |
| Baseline tumor size                  | >93 mm vs ≤93 mm <sup>b</sup> | 1.477               | (1.288-1.694) | <.0001   |
| Prior systemic BRAFi therapy         | Yes vs no                     | 1.307               | (1.131-1.510) | .0003    |
| Sex                                  | Female vs male                | 1.223               | (1.086-1.379) | .0010    |
| Clinical Study                       | KEYNOTE-001 vs KEYNOTE006     | 0.891               | (0.756-1.049) | .1666    |
| Clinical Study                       | KEYNOTE-002 vs KEYNOTE-006    | 1.178               | (1.004-1.382) | .0441    |
| Albumin                              | ≤0.834 vs >0.834              | 1.233               | (1.086-1.400) | .0012    |

Abbreviations: BRAFi, BRAF inhibitor; ECOG, Eastern Cooperative Oncology Group; LDH, lactate dehydrogenase; PD-L1, programmed death ligand 1; RECIST, Response Evaluation Criteria in Solid Tumors.

<sup>a</sup>Analysis included all patients regardless of *BRAF*-mutation status. <sup>b</sup>Cutoff chosen based on the value that showed the most significant difference in response.

**eTable 4. Any-Grade Treatment-Related Adverse Events That Occurred in ≥5% of Patients**

| Adverse Event, No. (%) | WT<br>n = 1124 | M<br>n = 434 | M + B/Mi<br>n = 271 | M – B/Mi<br>n = 164 |
|------------------------|----------------|--------------|---------------------|---------------------|
| Any                    | 922 (82.0)     | 333 (76.7)   | 194 (71.6)          | 139 (84.7)          |
| Fatigue                | 388 (34.5)     | 120 (27.6)   | 66 (24.4)           | 54 (33.1)           |
| Pruritus               | 294 (26.2)     | 90 (20.7)    | 47 (17.3)           | 43 (26.4)           |
| Diarrhea               | 207 (18.4)     | 74 (17.1)    | 39 (14.4)           | 35 (21.5)           |
| Rash                   | 232 (20.6)     | 56 (12.9)    | 29 (10.7)           | 27 (16.6)           |
| Arthralgia             | 172 (15.3)     | 53 (12.2)    | 34 (12.5)           | 19 (11.7)           |
| Vitiligo               | 131 (11.7)     | 56 (12.9)    | 26 (9.6)            | 30 (18.4)           |
| Nausea                 | 144 (12.8)     | 62 (14.3)    | 34 (12.5)           | 28 (17.2)           |
| Hypothyroidism         | 93 (8.3)       | 50 (11.5)    | 25 (9.2)            | 25 (15.3)           |
| Asthenia               | 107 (9.5)      | 48 (11.1)    | 28 (10.3)           | 20 (12.3)           |
| Myalgia                | 93 (8.3)       | 33 (7.6)     | 16 (5.9)            | 17 (10.4)           |
| Headache               | 69 (6.1)       | 29 (6.7)     | 12 (4.4)            | 17 (10.4)           |
| Decreased appetite     | 111 (9.9)      | 21 (4.8)     | 15 (5.5)            | 6 (3.7)             |
| Cough                  | 77 (6.9)       | 24 (5.5)     | 12 (4.4)            | 12 (7.4)            |
| Pyrexia                | 66 (5.9)       | 17 (3.9)     | 12 (4.4)            | 5 (3.1)             |
| Dyspnea                | 53 (4.7)       | 23 (5.3)     | 13 (4.8)            | 10 (6.1)            |
| Vomiting               | 49 (4.4)       | 26 (6.0)     | 15 (5.5)            | 11 (6.7)            |
| AST increased          | 48 (4.3)       | 23 (5.3)     | 13 (4.8)            | 10 (6.1)            |
| ALT increased          | 45 (4.0)       | 24 (5.5)     | 13 (4.8)            | 11 (6.7)            |
| Abdominal pain         | 38 (3.4)       | 22 (5.1)     | 11 (4.1)            | 11 (6.7)            |
| Hyperthyroidism        | 28 (2.5)       | 20 (4.6)     | 10 (3.7)            | 10 (6.1)            |
| Dry mouth              | 41 (3.6)       | 24 (5.5)     | 12 (4.4)            | 12 (7.4)            |
| Dry skin               | 47 (4.2)       | 18 (4.1)     | 9 (3.3)             | 9 (5.5)             |
| Chills                 | 57 (5.1)       | 10 (2.3)     | 5 (1.8)             | 5 (3.1)             |

Abbreviations: ALT, alanine aminotransferase; AST, aspartate aminotransferase; + B/Mi, prior treatment with BRAFi and/or MEK inhibitor; – B/Mi, no prior treatment with BRAFi and/or MEK inhibitor; M, mutant *BRAF*<sup>V600E/K</sup>; WT, wild type *BRAF*<sup>V600</sup>.

**eFigure 1. Overall Response Rate in Evaluable Patients (N = 1558) With *BRAF* Wild-Type Versus Mutant Melanoma**

Overall response rate in patients with WT versus mutant melanoma (left) and patients who were BRAFi ± MEKi treated versus BRAFi ± MEKi therapy naive (right). Abbreviations: +, B/Mi, prior treatment with BRAFi and/or MEK inhibitor; -, B/Mi, no prior treatment with BRAFi and/or MEK inhibitor; diff, difference; ECOG PS, Eastern Cooperative Oncology Group performance status; LDH, lactate dehydrogenase; M, mutant *BRAF*<sup>V600E/K</sup>; NA, not applicable; ORR, objective response rate; WT, wild-type *BRAF*<sup>V600</sup>.

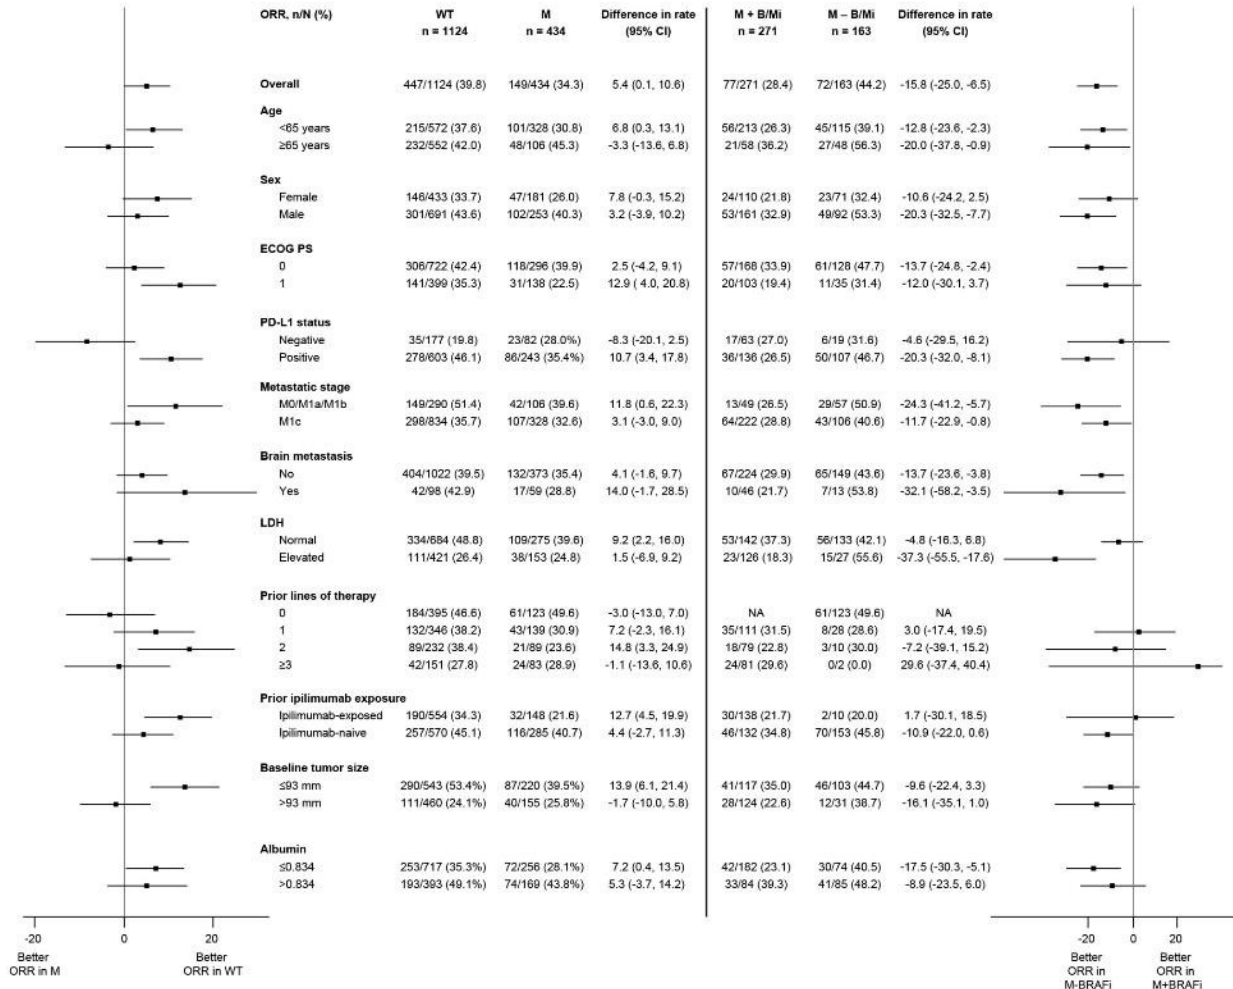

**eFigure 2. Four-Year Progression-Free Survival (PFS) and Overall Survival (OS) in Patients With *BRAF* Wild-Type Versus Mutant Melanoma**

A, 4-year PFS rate in evaluable patients (N = 1558) with *BRAF* WT versus mutant melanoma (left), and patients with mutant disease who were BRAFi ± MEKi treated versus BRAFi ± MEKi therapy naive (right). B, 4-year OS rate in evaluable patients (N = 1558) with *BRAF* WT versus mutant melanoma (left), and patients with mutant disease who were BRAFi ± MEKi treated versus BRAFi ± MEKi therapy naive (right). Abbreviations: +, B/Mi, prior treatment with BRAFi and/or MEK inhibitor; – B/Mi, no prior treatment with BRAFi and/or MEK inhibitor; diff, difference; ECOG PS, Eastern Cooperative Oncology Group performance status; LDH, lactate dehydrogenase; M, mutant *BRAF*<sup>V600E/K</sup>; OS, overall survival; PFS, progression-free survival; PM, person-month; WT, wild-type *BRAF*<sup>V600</sup>.

**A**

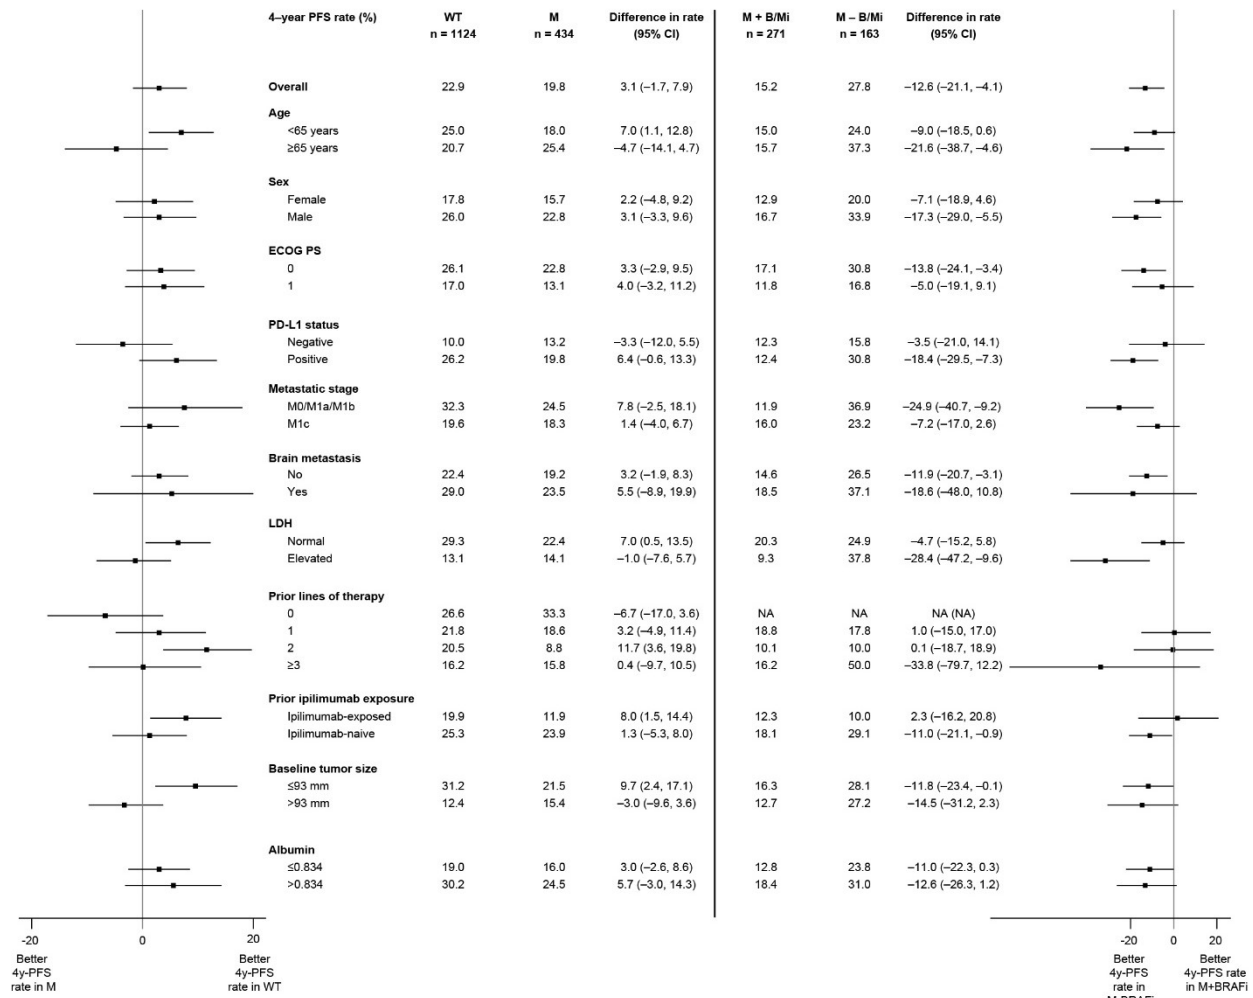



**B**

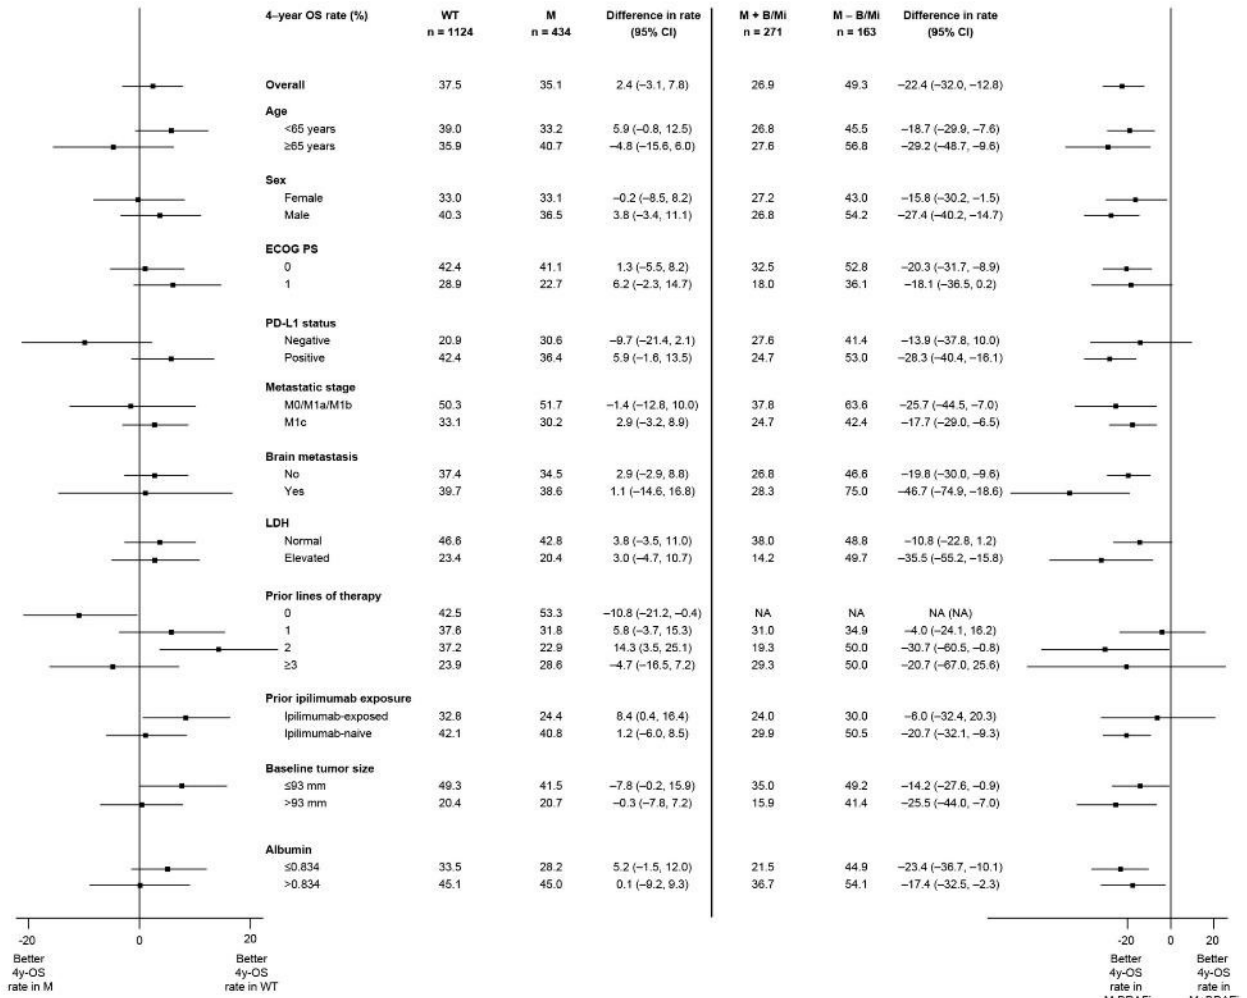

**eFigure 3. Kaplan-Meier Estimates of Overall Survival**

A, Patients with *BRAF* wild-type versus mutant melanoma. B, Patients with mutant disease, and patients who were BRAFi ± MEKi treated versus BRAFi ± MEKi naive

A

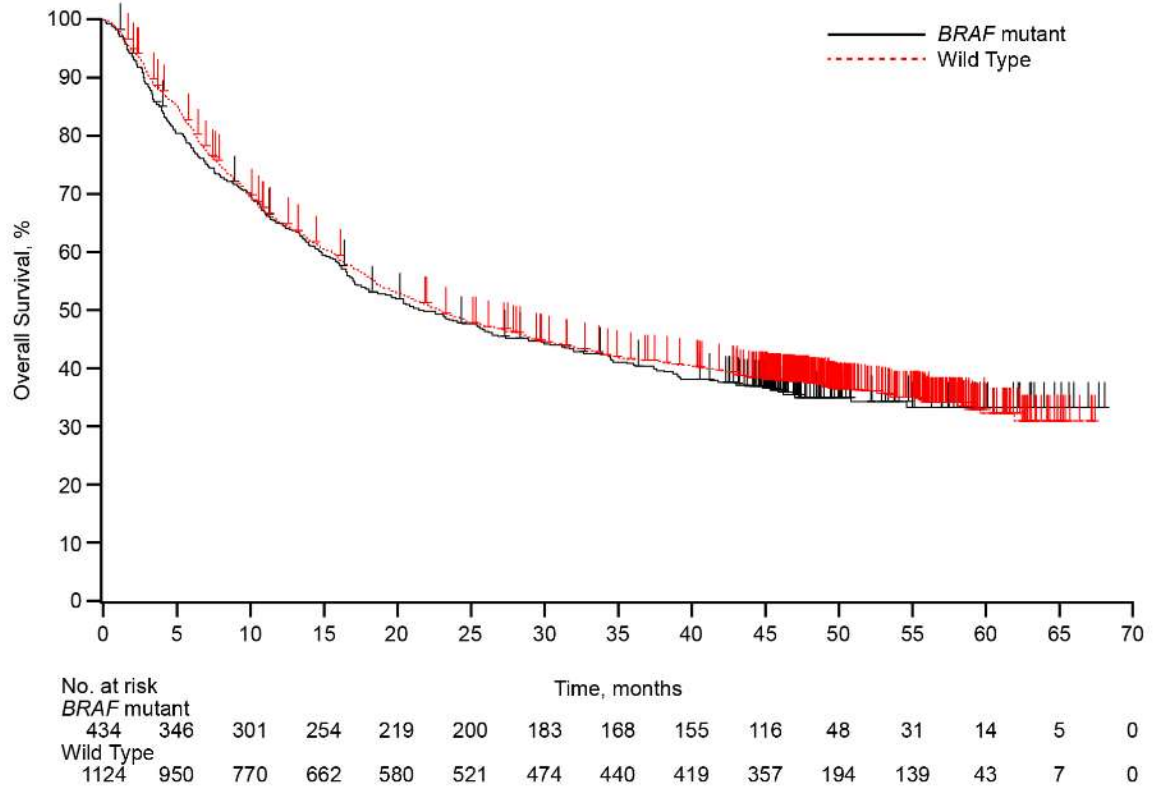

B

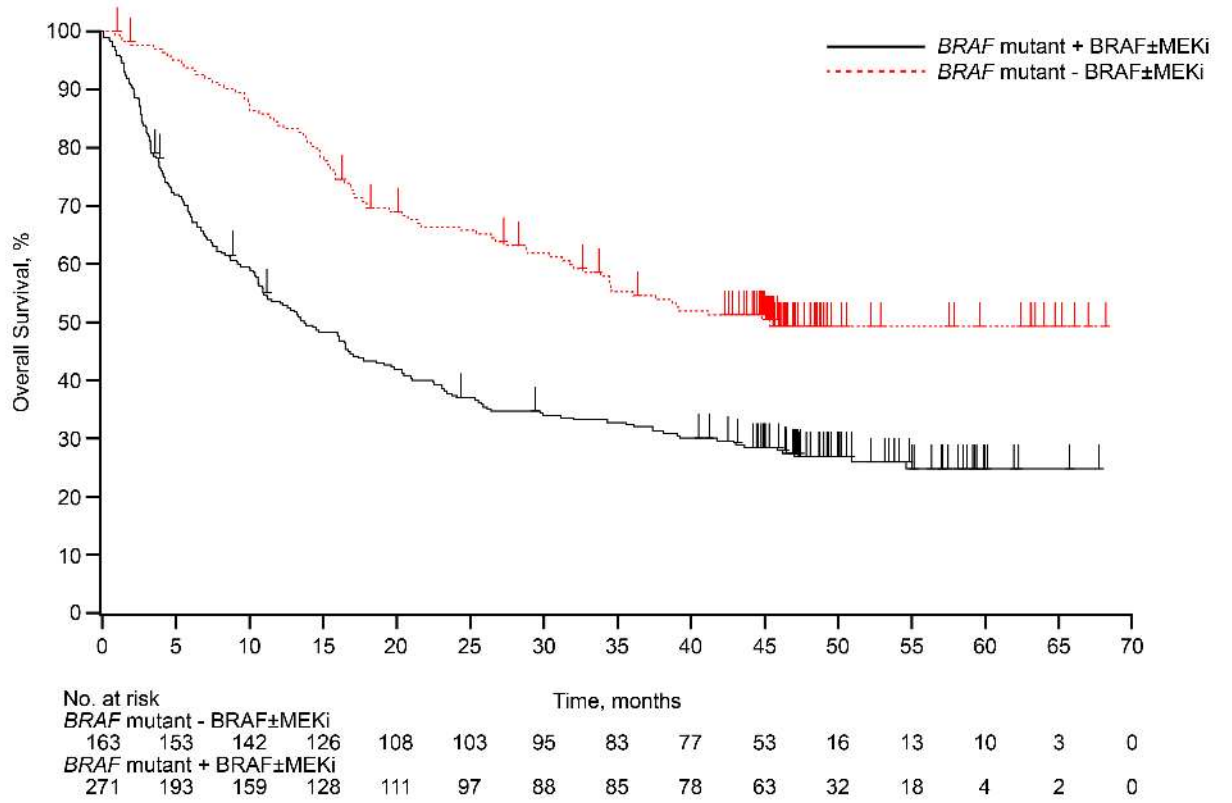

Supplement: jamaoncol-6-1256-s001.pdf [file jamaoncol-6-1256-s001.pdf]
